# Supplementary material for: Viral Communities Associated with Human Pericardial Fluids in Idiopathic Pericarditis
Source: PubMed Central journal article supplement (PMC3972187; doi:10.1371/journal.pone.0093367), 2014-04-01

2 000 4 000 6 000

Human Papillomavirus type 12

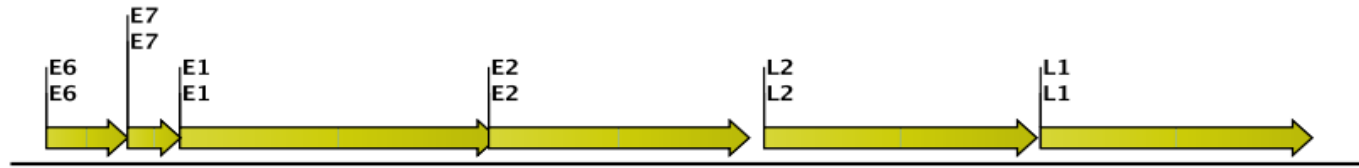

Reference coverage: 57.51% (4413 bp)

Average coverage depth: 0.93

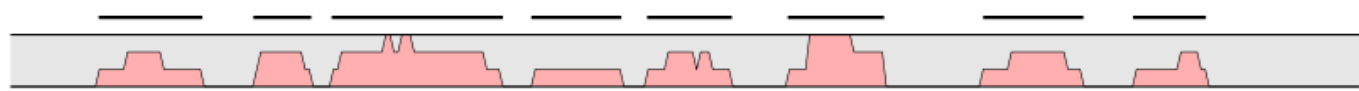

2 000 4 000 6 000

Human Papillomavirus type 50

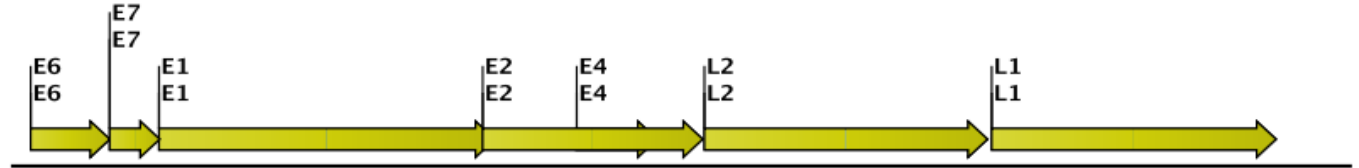

Reference coverage: 93.55% (6721 bp)

Average coverage depth: 3.5

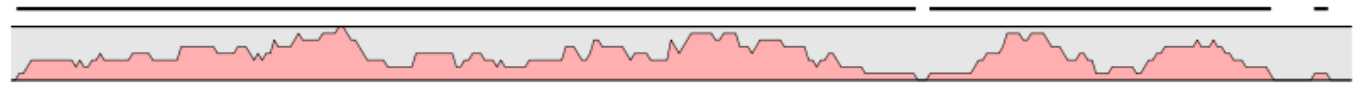

2 000 4 000 6 000

Human Papillomavirus type 80

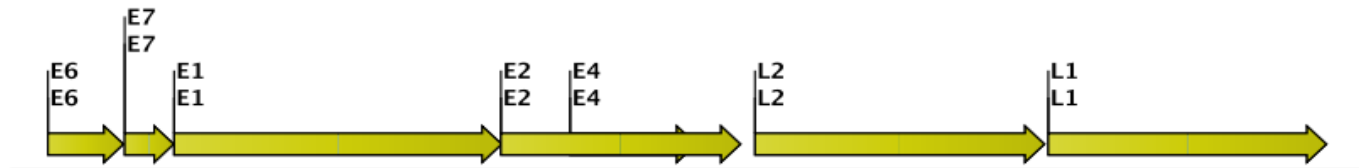

Reference coverage: 66.98% (4975 bp)

Average coverage depth: 1.04

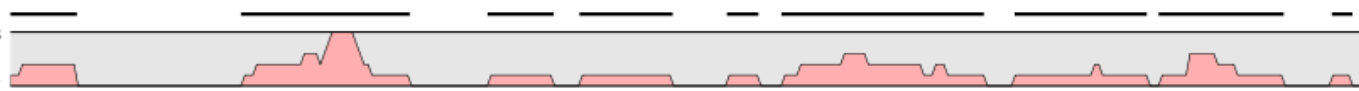

1 000 2 000 3 000 4 000 5 000 6 000 7 000

Human papillomavirus isolate 915 F 06 002 KN1

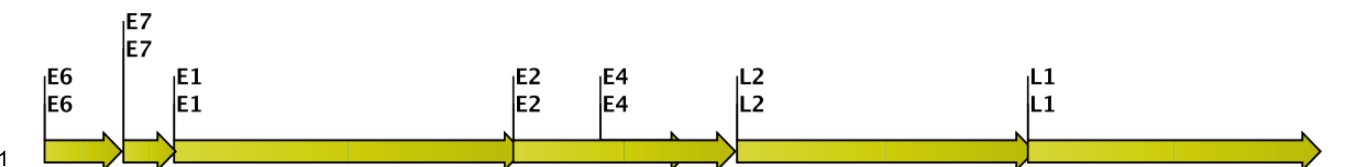

Reference coverage: 78% (5737 bp)

Average coverage depth: 1.57

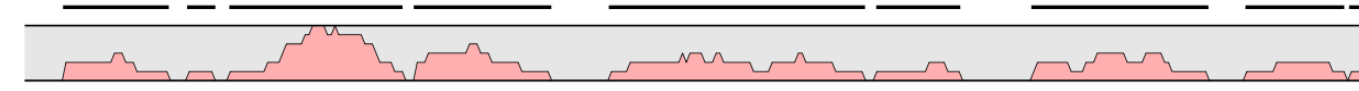

Supplement: pone.0093367.s002.pdf [file pone.0093367.s002.pdf]
