# Supplementary material for: Viral Communities Associated with Human Pericardial Fluids in Idiopathic Pericarditis
Source: PubMed Central journal article supplement (PMC3972187; doi:10.1371/journal.pone.0093367), 2014-04-01

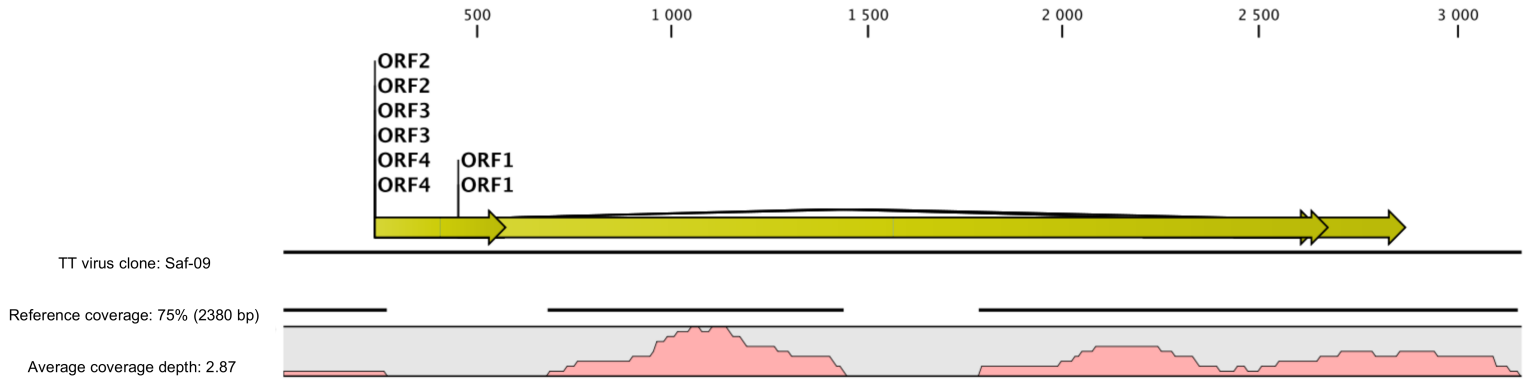

Supplement: pone.0093367.s003.pdf [file pone.0093367.s003.pdf]
