# Supplementary material for: Viral Communities Associated with Human Pericardial Fluids in Idiopathic Pericarditis
Source: PubMed Central journal article supplement (PMC3972187; doi:10.1371/journal.pone.0093367), 2014-04-01

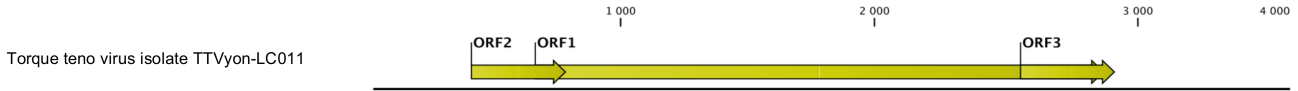

Reference coverage: 100% (3677 bp)

Average coverage depth: 167.55

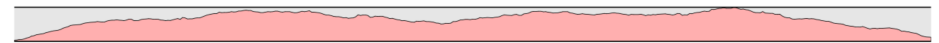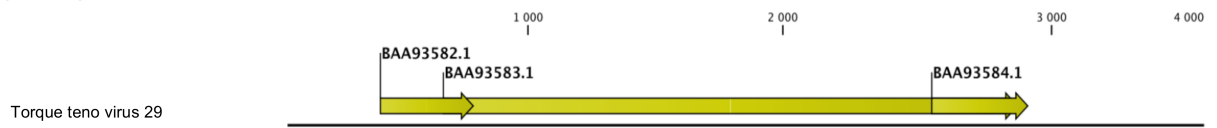

Reference coverage: 100% (3676 bp)

Average coverage depth: 167.7

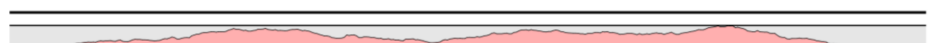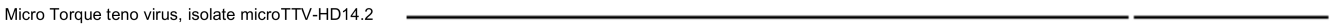

Reference coverage: 100% (1220 bp)

Average coverage depth: 144.8

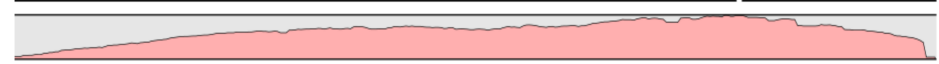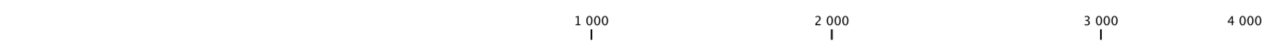

Reference coverage: 100% (3724 bp)

Average coverage depth: 147.54

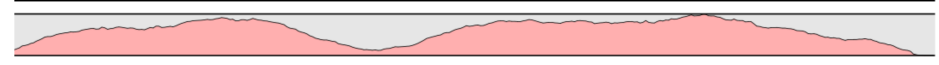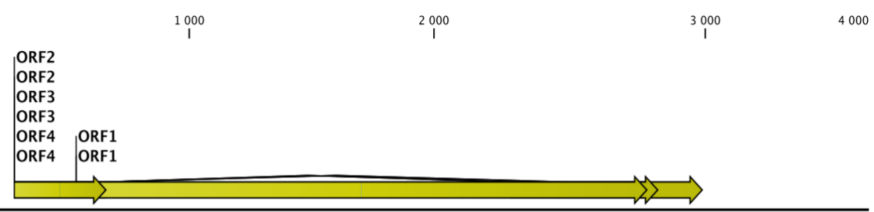

Reference coverage: 100% (3713 bp)

Average coverage depth: 149.01

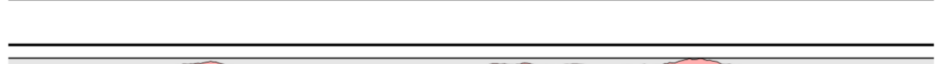

Supplement: pone.0093367.s005.pdf [file pone.0093367.s005.pdf]
